# Supplementary material for: Activity of NaV1.2 promotes neurodegeneration in an animal model of multiple sclerosis
Source: JCI journal article supplement (doi:10.1172/jci.insight.89810), 2016-11-16
Supplement: sd1 [file 1]

## SUPPLEMENTAL INFORMATION

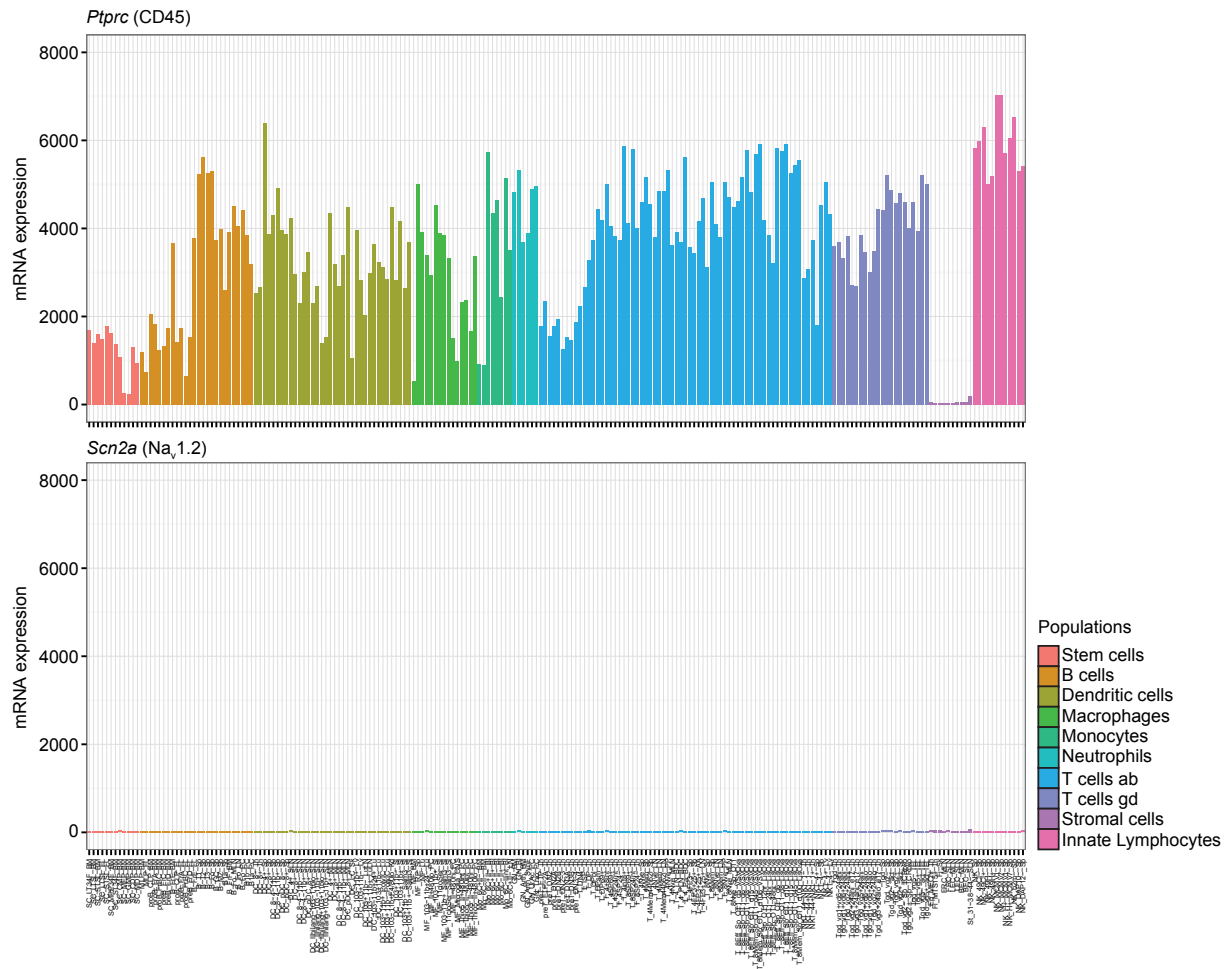

**Supplemental Figure 1. *Scn2a* is absent in immune cells.** Raw ImmGen datasets were downloaded from NCBI's GEO data repository (GSE15907: Immunological Genome Project data) and information for *Scn2a* (Nav1.2; probe set ID: 10472364) and *Ptpcr* (CD45; probe set ID: 10358224) as control transcript expressed by immune cells, were processed and visualized by R Bioconductor software. mRNA expression in several immune cell subtypes (color-coded for indicated cell populations) from both genes are presented.
